# Supplementary material for: The Emotional Experience of Mexican Women with SARS-CoV-2 during Pregnancy—A Qualitative Study
Source: Preprints.org preprint supplement (doi:10.20944/preprints202309.0182.v1), 2023-09-05
Supplement: Supplementary file 1 [file supplementary]

**S1. INTERVIEW GUIDE**

| **Themes** | **Questions** | **Matters to explore** |
| --- | --- | --- |
| 1. Maternal health before pregnancy | How was your health before getting pregnant? | - Overall health - Healthcare - Eating habits, exercise, previous consumption of cigarettes, alcohol, and/or other substances; emotional state before pregnancy |
| 2. Pregnancy before COVID-19 | How were you experiencing your pregnancy before the disease? | - Symptoms and pregnancy planning; reaction of the woman, her partner and her family to the pregnancy - Diagnosis of obstetrical complications; medical care - Mood - Relatives sick with COVID-19; relatives who died because of the disease - Expectations towards pregnancy; changes experienced |
| 3. Diagnosis of COVID-19 | What was your experience like when getting sick with COVID-19? | - Number of weeks pregnant when getting infected - Information about the disease - Symptoms and diagnosis of the disease - Treatment - Experiences and emotions towards the disease - Isolation and social support - Medical care - Experience of the disease in relatives - Experience of quarantine |
| 4. Pregnancy after COVID-19 | How did you experience your pregnancy after the disease? | - Special care - Recovery from COVID-19 - Mood - Support received |
| 5. Pregnancy resolution | How did you experience the resolution of your pregnancy? | - Type of pregnancy resolution - Experience during pregnancy resolution - Perception of medical care - Complications - Emotions during pregnancy resolution; mood - Support from family and staff - Hospital stay: experience and care - Recovery - Communication and information on the baby - Hospital discharge |
| 6. Postpartum | What was your postpartum experience? | - Going back home - Care for the baby - Extension of isolation - Support from family and others - Medical care - Special care - Mood - Life changes caused by COVID-19 and the new baby |
